# Supplementary material for: Early Adolescent Friendship Selection Based on Externalizing Behavior: the Moderating Role of Pubertal Development. The SNARE Study
Source: J Abnorm Child Psychol. 2016 Feb 20;44(8):1647–57. doi: 10.1007/s10802-016-0134-z (PMC5061845; doi:10.1007/s10802-016-0134-z)
Supplement: Supplementary file 1 — (DOC 46 kb) [file 10802_2016_134_MOESM1_ESM.doc]

Table 4

*Estimates Evaluation Functions and Standard Errors of Selection and Influence Effects for Externalizing Behavior and Pubertal Development in Friendship Networks for Two Schools, Two Cohorts, Time 1, 2, and 3*

Variable School 1 School

Cohort 1 Cohort 2 Cohort 1 Cohort 2

*N 432 390 186 136*

*Network Dynamics*

1 Outdegree (density) 1A Period 1 -2.12* (0.24) -2.44* (0.23) -2.53* (0.29) 0.54 (1.26)

Period 2 0.08 (0.21) 0.27 (0.21) 0.11 (0.25) -0.49 (0.51)

Reciprocity 1B 2.90* (0.11) 2.39* (0.09) 2.36* (0.17) 2.63* (0.19)

Transitive triplets 1C 0.56* (0.02) 0.49* (0.02) 0.47* (0.03) 0.57* (0.05)

Transitive reciprocated triplets 1D -0.52* (0.03) -0.38* (0.03) -0.43* (0.05) -0.36* (0.07)

3-cycles 1E -0.04 (0.02) -0.10* (0.02) -0.03 (0.04) -0.07 (0.06)

Indegree - popularity (sqrt) 1F Period 1 0.08* (0.03) -0.08* (0.03) 0.21* (0.04) -0.01 (0.08)

Period 2 -0.11 (0.07) -0.22* (0.07) -0.07 (0.08) -0.20 (0.15)

Indegree – activity (sqrt) 1G -1.10* (0.14) -0.76* (0.10) -1.13* (0.23) -1.79* (0.58)

Outdegree – activity (sqrt) 1H 0.15* (0.03) 0.16* (0.02) 0.30* (0.06) -0.02 (0.08)

2 Sex received 2A -0.19* (0.04) -0.05 (0.05) 0.10 (0.06) -0.17 (0.09)

Sex sent 2B -0.02 (0.05) 0.07 (0.05) -0.15 (0.09) -0.72* (0.20)

Sex similarity 2C 0.67* (0.04) 0.84* (0.04) 0.65* (0.07) 0.59* (0.09)

Location similarity 2C 0.43* (0.05) 0.34* (0.05) - -

Class similarity 2C 0.70* (0.05) 0.84* (0.05) 0.94* (0.07) 0.54* (0.11)

Externalizing behavior received 2B 0.03 (0.04) 0.21* (0.04) 0.07 (0.09) -0.03 (0.10)

Externalizing behavior sent 2A 0.12* (0.05) 0.29* (0.04) 0.18 (0.10) 0.72* (0.24)

Externalizing behavior similarity 2C 0.40* (0.18) 1.00* (0.15) 0.60 (0.37) -0.09 (0.43)

Pubertal development received 2B -0.03 (0.02) 0.02 (0.02) -0.08* (0.03) 0.04 (0.04)

Pubertal development sent 2A -0.03 (0.02) 0.01 (0.02) -0.06 (0.04) -0.15* (0.06)

Pubertal development similarity 2C 0.24* (0.11) 0.61* (0.14) 0.55* (0.22) -0.12 (0.30)

Pubertal development sent x 1.03* (0.40) 0.54 (0.31) 1.83* (0.66) 0.19 (0.80)

externalizing behavior similarity maintain 2D

Pubertal development sent x -0.42 (0.34) -0.49 (0.30) -0.80 (0.55) 0.19 (0.72)

externalizing behavior similarity create 2E

*Behavior Dynamics*

3 Externalizing behavior change period 13A 1.33* (0.18) 1.40* (0.26) 1.31* (0.30) 1.48* (0.33)

Externalizing behavior change period 2 3A 1.54* (0.21) 1.74* (0.32) 1.54* (0.37) 0.99* (0.23)

Externalizing behavior change -1.28* (0.11) -1.19* (0.11) -1.47* (0.22) -1.30* (0.27)

linear shape 3A

Externalizing behavior change 0.28* (0.08) 0.13 (0.10) 0.33* (0.15) 0.17 (0.21)

quadratic shape 3A

Externalizing behavior influence 3B 1.19* (0.31) 1.06* (0.30) -0.03 (0.85) 1.86 (1.33)

Effect from pubertal development 3C 0.11 (0.09) -0.09 (0.14) 0.32 (0.17) 0.21 (0.23)

Pubertal development x externalizing 0.04 (0.36) 0.85 (0.57) 1.28 (1.32) -2.51 (1.63)

behavior influence 3D

*Note. p* < .10 * *p* < .05. 1 effects estimating the structure of the friendship network, for descriptions of single effects see the main text. 2 effects estimating friendship selection. 2A received effects estimate the number of received friendship ties for participants with this characteristic. 2B sent effects estimate the number of sent out friendship ties for participants with this characteristic. 2C similarity effects estimate if participants base friendship selection on similarity of this characteristic. 2D interaction assessing the impact of pubertal development on likelihood of maintaining friendships based on externalizing behavior. 2E interaction assessing the impact of pubertal development on likelihood of creating friendships based on externalizing behavior 3 effects estimating the change of behavior. 3A estimating the development of externalizing behavior, and if this has a linear or quadratic shape. 3B estimating the effect of this characteristic on the development of externalizing behavior. 3C estimating the effect of the average externalizing behavior of friends on the development of participants’ externalizing behavior. 3D interaction assessing the impact of pubertal development on friends’ influence on the development of participants’ externalizing behavior.
